# Supplementary material for: Genome-wide variation and identification of vaccine targets in the Plasmodium falciparum genome
Source: Springer Nature journal article supplement (doi:10.1038/ng1924), 2006-12-10
Supplement: ng1924-S6.pdf [file ng1924-S6.pdf]

**Supplemental Table 2.** DNA sequences and SNPs obtained from 99 worldwide isolates\*

| <b>Genes</b> | <b>Annotation</b>                    | <b>Bp<br/>Seq.</b> | <b>SNPs<br/>(≥ 0.05)</b> | <b>SNPs<br/>(&lt; 0.05)</b> |
|--------------|--------------------------------------|--------------------|--------------------------|-----------------------------|
| PFC0050c     | long chain fatty acid ligase         | 570                | 3                        | 5                           |
| PFC0060c     | serine/threonine protein kinase      | 520                | 0                        | 2                           |
| PFC0070c     | hypothetical protein                 | 423                | 2                        | 4                           |
| PFC0075c     | hypothetical protein                 | 289                | 0                        | 2                           |
| PFC0080c     | hypothetical protein                 | 497                | 0                        | 2                           |
| PFC0090w     | hypothetical protein                 | 470                | 3                        | 2                           |
| PFC0095c     | hypothetical protein                 | 560                | 1                        | 1                           |
| PFC0100c     | regulatory protein                   | 536                | 1                        | 1                           |
| PFC0125w     | ABC transporter                      | 1250               | 1                        | 5                           |
| PFC0135c     | conserved protein                    | 570                | 0                        | 0                           |
| PFC0165w     | hypothetical protein                 | 572                | 1                        | 4                           |
| PFC0170c     | dihydrolipoamide acyltransferase     | 510                | 1                        | 3                           |
| PFC0175w     | IBR domain protein                   | 780                | 0                        | 3                           |
| PFC0180c     | hypothetical protein                 | 452                | 0                        | 2                           |
| PFC0185w     | hypothetical protein                 | 407                | 0                        | 2                           |
| PFC0195w     | hypothetical protein                 | 457                | 0                        | 2                           |
| PFC0215c     | hypothetical protein                 | 820                | 3                        | 2                           |
| PFC0220w     | hypothetical protein                 | 80                 | 0                        | 1                           |
| PFC0225c     | elongation factor (EF-TS)            | 320                | 0                        | 1                           |
| PFC0230c     | hypothetical protein                 | 890                | 2                        | 1                           |
| PFC0235w     | hypothetical protein                 | 430                | 0                        | 2                           |
| PFC0245c     | hypothetical protein                 | 450                | 0                        | 2                           |
| PFC0250c     | AP endonuclease                      | 460                | 1                        | 5                           |
| PFC0255c     | ubiquitin-conjugating enzyme E2      | 350                | 0                        | 3                           |
| PFC0260w     | hypothetical protein                 | 325                | 0                        | 3                           |
| PFC0265c     | hypothetical protein                 | 540                | 0                        | 3                           |
| PFC0270w     | hypothetical protein                 | 250                | 0                        | 0                           |
| PFC0285c     | T-complex protein beta subunit       | 450                | 0                        | 2                           |
| PFC0295c     | 40S ribosomal protein S12            | 370                | 0                        | 1                           |
| PFC0310c     | ATP-dependent CLP protease           | 920                | 0                        | 3                           |
| PFC0325c     | hypothetical protein                 | 530                | 0                        | 1                           |
| PFC0330w     | PDZ domain protein                   | 494                | 0                        | 1                           |
| PFC0335c     | hypothetical protein                 | 250                | 0                        | 1                           |
| PFC0340w     | DNA polymerase delta small subunit   | 497                | 0                        | 2                           |
| PFC0345w     | hypothetical protein                 | 499                | 0                        | 1                           |
| PFC0355c     | hypothetical protein                 | 450                | 0                        | 1                           |
| PFC0370w     | hypothetical protein                 | 420                | 0                        | 3                           |
| PFC0380w     | dual-specificity protein phosphatase | 450                | 0                        | 3                           |
| PFC0395w     | asparagine synthetase                | 300                | 0                        | 2                           |
| PFC0410w     | rat BRAIN protein-like               | 240                | 0                        | 0                           |
| PFC0420w     | calcium-dependent protein kinase     | 450                | 0                        | 3                           |
| PFC0425w     | hypothetical protein                 | 460                | 0                        | 3                           |
| PFC0435w     | hypothetical protein                 | 589                | 0                        | 0                           |
| PFC0440c     | helicase, putative                   | 579                | 0                        | 3                           |

**Supplemental Table 2 (2)**

---

|          |                                             |     |   |   |
|----------|---------------------------------------------|-----|---|---|
| PFC0441c | hypothetical protein                        | 370 | 0 | 1 |
| PFC0460w | hypothetical protein                        | 510 | 0 | 4 |
| PFC0465c | hypothetical protein                        | 420 | 0 | 1 |
| PFC0485w | protein kinase                              | 742 | 0 | 4 |
| PFC0486c | hypothetical protein                        | 420 | 0 | 0 |
| PFC0505c | hypothetical protein                        | 786 | 0 | 2 |
| PFC0510w | zinc finger protein                         | 520 | 1 | 2 |
| PFC0515c | hypothetical protein                        | 320 | 0 | 2 |
| PFC0530w | hypothetical protein                        | 390 | 0 | 2 |
| PFC0545c | hypothetical protein                        | 470 | 0 | 1 |
| PFC0550w | hypothetical protein                        | 270 | 0 | 0 |
| PFC0560c | hypothetical protein                        | 300 | 0 | 1 |
| PFC0570c | hypothetical protein                        | 200 | 0 | 0 |
| PFC0580c | hypothetical protein                        | 277 | 0 | 1 |
| PFC0600w | hypothetical protein                        | 128 | 0 | 0 |
| PFC0615w | hypothetical protein                        | 345 | 1 | 0 |
| PFC0625w | hypothetical protein                        | 570 | 0 | 0 |
| PFC0630w | hypothetical protein                        | 450 | 0 | 2 |
| PFC0640w | CTRP protein                                | 780 | 1 | 0 |
| PFC0650w | hypothetical protein                        | 355 | 0 | 3 |
| PFC0701w | hypothetical protein                        | 357 | 0 | 2 |
| PFC0705c | hypothetical protein                        | 296 | 0 | 0 |
| PFC0730w | conserved protein                           | 342 | 0 | 0 |
| PFC0735w | 40S ribosomal protein S15A                  | 240 | 0 | 1 |
| PFC0745c | proteasome component C8                     | 330 | 0 | 1 |
| PFC0755c | protein kinase, putative                    | 300 | 0 | 0 |
| PFC0760c | hypothetical protein                        | 750 | 0 | 2 |
| PFC0765c | hypothetical protein                        | 700 | 0 | 2 |
| PFC0770c | kinesin-related protein                     | 300 | 0 | 1 |
| PFC0775w | 40S ribosomal protein S11                   | 203 | 0 | 0 |
| PFC0790w | hypothetical protein                        | 540 | 0 | 0 |
| PFC0805w | DNA-directed RNA polymerase II              | 150 | 0 | 0 |
| PFC0830w | trophozoite stage antigen                   | 310 | 2 | 0 |
| PFC0831w | triosephosphate isomerase                   | 320 | 0 | 1 |
| PFC0835c | hypothetical protein                        | 250 | 0 | 0 |
| PFC0840w | P-type ATPase, putative                     | 327 | 0 | 1 |
| PFC0850c | hypothetical protein                        | 460 | 0 | 2 |
| PFC0870w | elongation factor 1 (EF-1)                  | 310 | 0 | 1 |
| PFC0880c | hypothetical protein                        | 351 | 0 | 0 |
| PFC0905c | hypothetical protein                        | 450 | 0 | 1 |
| PFC0910w | hypothetical protein                        | 345 | 0 | 1 |
| PFC0915w | ATP-dependent RNA helicase                  | 305 | 0 | 0 |
| PFC0930c | hypothetical protein                        | 390 | 0 | 2 |
| PFC0935c | N-acetylglucosamine-1-phosphate transferase | 377 | 1 | 0 |
| PFC0940c | hypothetical protein                        | 532 | 0 | 0 |
| PFC0945w | protein kinase, putative                    | 405 | 0 | 1 |
| PFC0955w | ATP-dependent RNA helicase                  | 720 | 1 | 1 |

---

**Supplemental Table 2 (3)**

|          |                                  |        |    |     |
|----------|----------------------------------|--------|----|-----|
| PFC0970w | hypothetical protein             | 450    | 0  | 2   |
| PFC0995c | diacylglycerol O-acyltransferase | 407    | 0  | 1   |
| PFC1000w | hypothetical protein             | 305    | 0  | 0   |
| PFC1011c | hypothetical protein             | 275    | 0  | 0   |
| PFC1030w | hypothetical protein             | 430    | 0  | 0   |
| PFC1045c | hypothetical protein             | 609    | 1  | 2   |
| PFC1055w | hypothetical protein             | 326    | 1  | 2   |
| PFC1060c | hypothetical protein             | 890    | 1  | 6   |
| PFC1090w | hypothetical protein, conserved  | 455    | 0  | 4   |
|          |                                  | 44,856 | 29 | 156 |

\*The data was part of published previous work (Mu et al., PLoS Biology 3, e335), but not analyzed or reported. Bp seq, basepairs sequenced; SNPs ( $\geq 0.05$ ), SNPs with a minor allele frequency  $\geq 0.05$ ; SNPs ( $< 0.05$ ), SNPs with a minor allele frequency  $< 0.05$ .
