# Supplementary figures and images for: Genome-wide variation and identification of vaccine targets in the Plasmodium falciparum genome
Source: Springer Nature journal article supplement (doi:10.1038/ng1924), 2006-12-10

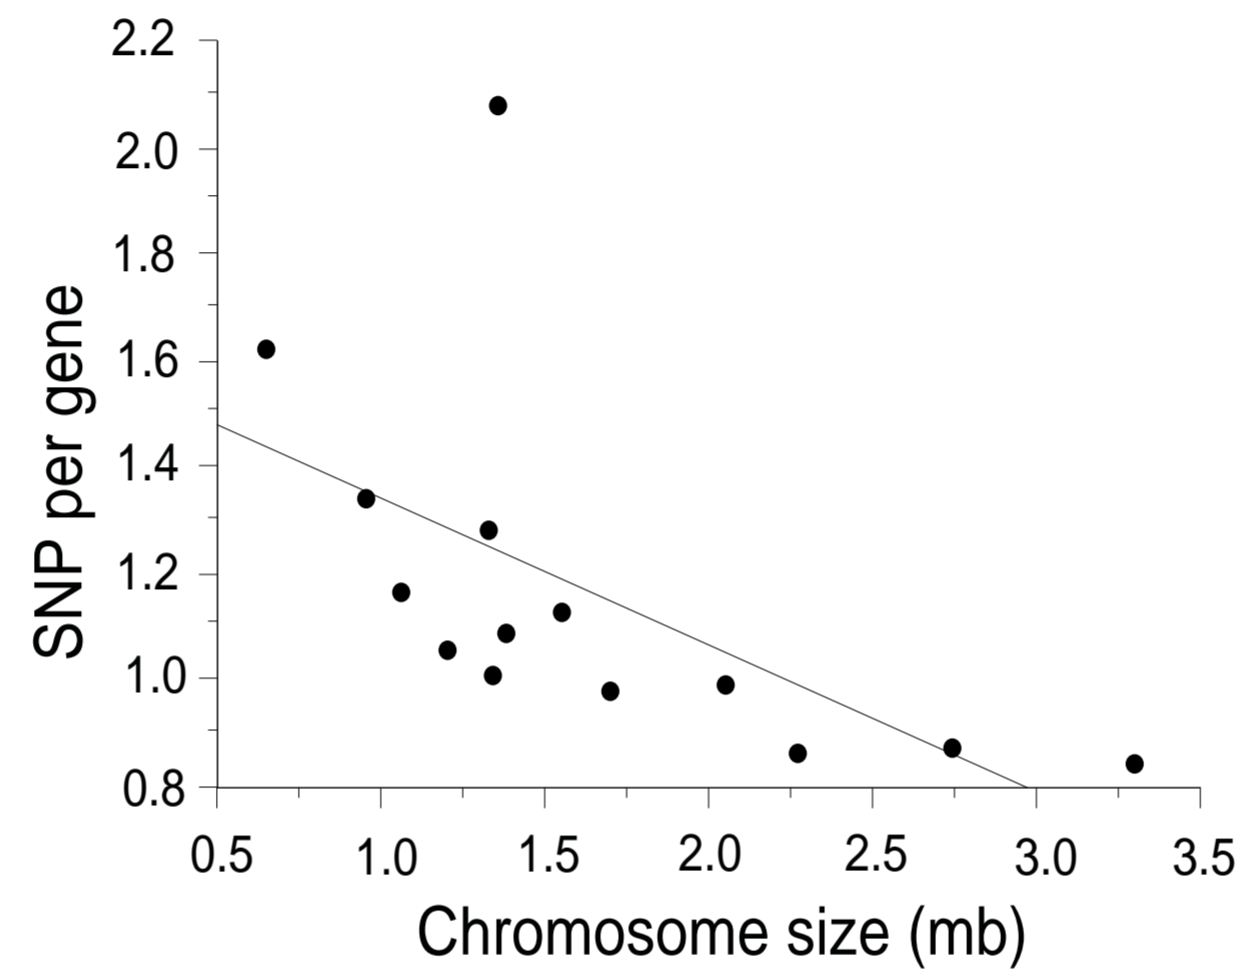

**Supplementary Figure 2.** Relationship of SNP density and chromosome size.

Supplement: ng1924-S2.pdf [file ng1924-S2.pdf]
